# Supplementary material
Source: PubMed Central journal article supplement (PMC6060353)
Supplement: JB.00220-18_zjb999094821s1.pdf [file JB.00220-18_zjb999094821s1.pdf]

**Phenotypic assessment suggests multiple start codons for HetN, an inhibitor of heterocyst differentiation, in *Anabaena* sp. strain PCC 7120**

Orion S. Rivers<sup>a,e</sup>, Silvia Beurmann<sup>b</sup>, Alexa Dow<sup>a</sup>, Loralyn M. Cozy<sup>c,#</sup>, and Patrick Videau<sup>d,f,#</sup>

- <sup>a</sup>Author affiliations: University of Hawaii at Manoa  
Department of Microbiology  
2538 McCarthy Mall,  
Honolulu, HI 96822
- <sup>b</sup>Author affiliations: University of Maryland  
Institute for Genome Sciences, Maryland School of Medicine  
655 W. Baltimore Street  
Baltimore, MD 21201
- <sup>c</sup>Author affiliations: Illinois Wesleyan University  
Department of Biology  
1312 Park Street  
Bloomington, IL 61701
- <sup>d</sup>Author affiliations: Dakota State University  
Biology Department, College of Arts and Sciences  
820 N. Washington Avenue  
Madison, SD 57042
- <sup>e</sup>Present address: Mississippi State University  
Institute for Imaging and Analytical Technologies  
100 Twelve Lane  
Mississippi State, MS 39762
- <sup>f</sup>Present address: Southern Oregon University  
Department of Biology  
1250 Siskiyou Boulevard  
Ashland, OR 97520
- <sup>#</sup>Corresponding author: Phone: 001 605 256 5183  
Fax: 001 605 256 5643  
E-mail: patrick.videau@dsu.edu
- <sup>#</sup>Corresponding Author Phone: 001 309 556-3057  
Fax: 001 309 556-3864  
Email: lcozy@iwu.edu

**Supplemental Material**

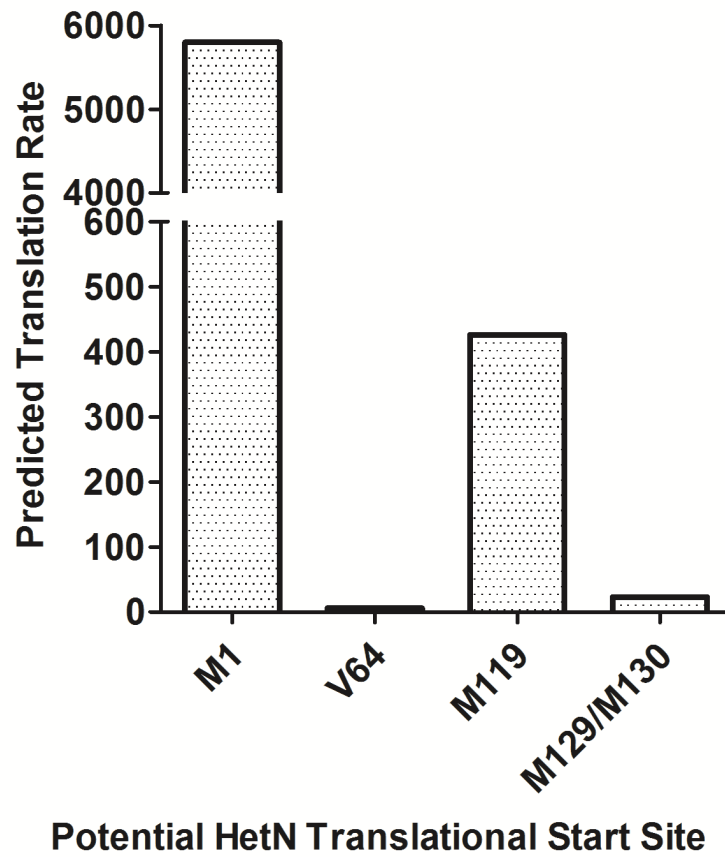

**Figure S1.** Bioinformatic prediction of the strength of ribosomal binding sites upstream of the potential translational start sites upstream of and within *hetN* using the RBS Calculator v2.0 program. Higher predicted translation rates indicate stronger predicted ribosomal binding sites.

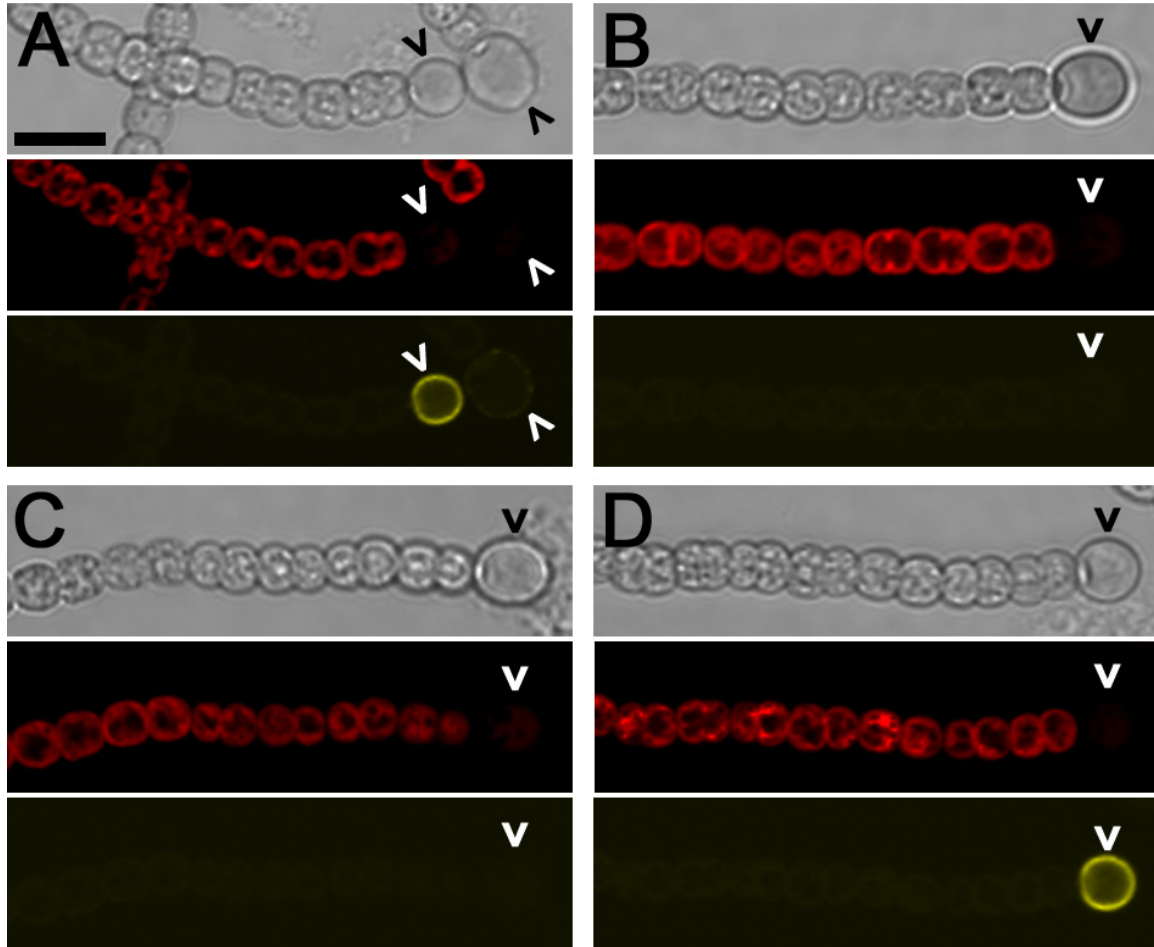

**Figure S2.** The M1 residue of *hetN* is required for heterocyst-specific translation and localization of a YFP fusion protein expressed from the native promoter. Strain UHM163, which contains *hetR(R250K)* at the native locus and forms heterocysts even when *hetN* is overexpressed, 24 h after the removal of combined nitrogen with the following plasmids: pAD127 containing  $P_{hetN}$ -*hetN*-YFP (A); pAD126 containing  $P_{hetN}$ -*hetN*(M1L, M119L, M129L, M130L)-YFP (B); pAD124 containing  $P_{hetN}$ -*hetN*(M1L, M129L, M130L)-YFP (C); or pAD125 containing  $P_{hetN}$ -*hetN*(M119L, M129L, M130L)-YFP (D). From top to bottom: bright-field, red autofluorescence, yellow fluorescence from HetN-YFP alleles. Carets indicate heterocysts. Bar in panel A, 10  $\mu$ m.

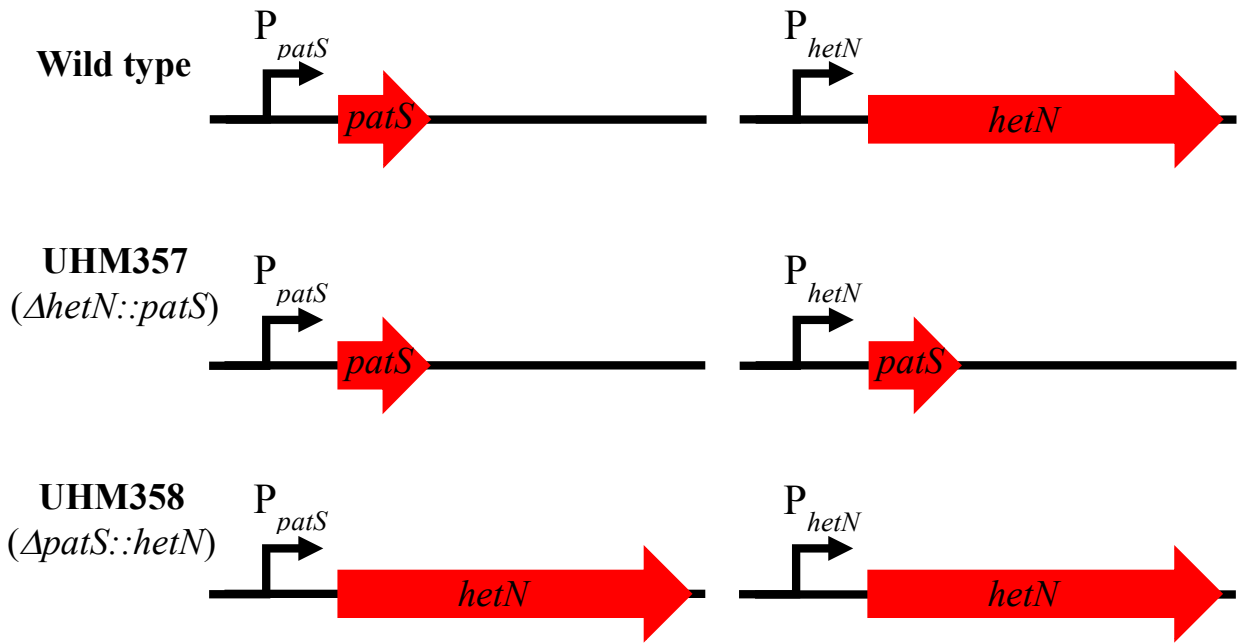

**Figure S3.** Schematic depicting the mutations introduced into the UHM357 and UHM358 strains. The wild type has a copy of *patS* controlled by  $P_{patS}$  and *hetN* controlled by  $P_{hetN}$ , both at the native loci. UHM357 has had the coding region of *hetN* replaced with the *patS* coding region, and UHM358 has had the coding region of *patS* replaced with the *hetN* coding region, both at the native loci.

**Table S1.** Oligonucleotide primers used in this study.

| Oligonucleotide primers | Sequence*                                                         |
|-------------------------|-------------------------------------------------------------------|
| 3'patSBglIIR            | AGATCTGGGAGTAAATTGTAAATCATAGAAC                                   |
| 5'patSSacF              | GAGCTCCGCATCTTTTATTCAAGCTAACTAGC                                  |
| dhetNup-S-OEX-F         | GTGAATTTCTGTGATGAGCGCGGTAGTGGTAGATAGCTCCGCAGT<br>TGCTTAGGGAATGAG  |
| dhetNup-S-OEX-R         | CTCATCACAGAAATTCACATAACATAATTGCCTTCATTGTAACCTG<br>CTAGTCTCCAAATTC |
| down-hetN-R             | GGATCCGCCCATTAATATAAGTCTC                                         |
| dpatS-N-OEX-F           | TTTAAGATTATGACAACCTTACAGGTAAGACAGTAC                              |
| dpatS-N-OEX-R           | ACACTCGTTTCATGAGCGATGAGACTCAACAGCTACATAG                          |
| dpatSdn-N-OEX-F         | CGCTCATGAAACGAGTGTA AAAATTCTGCCTCGACTATCG                         |
| dpatSup-N-OEX-R         | AGTTGTCATAATCTTAAAATCGGTGAATTACTTTTCAACAG                         |
| hetIR-SacI              | GAGCTCTGGAACCAGGGCAAGTTAAATTT                                     |
| hetMF-BamHI             | GGATCCTAGAACGCTGGTCTGATGAACAA                                     |
| HetN E->A Fwd           | GCATGATGGCACGCGGTAGTGGTCGGATTG                                    |
| HetN E->A Rev           | CAATCCGACCACTACCGCGTGCCATCATGC                                    |
| HetN E->L Fwd           | GCATGATGCTACGCGGTAGTGGTCGGATTG                                    |
| HetN E->L Rev           | CAATCCGACCACTACCGCGTAGCATCATGC                                    |
| HetN E->Q Fwd           | GCATGATGCAACGCGGTAGTGGTCGGATTG                                    |
| HetN E->Q Rev           | CAATCCGACCACTACCGCGTTGCATCATGC                                    |
| hetN Mod-M1 F           | ACTAGCAGGTTACTACTCACA ACTCTTACAGG                                 |
| hetN Mod-M1 R           | CCTGTAAGAGTTGTGAGTGTAACCTGCTAGT                                   |
| hetN SacI-R             | CGCCGAGCTCGCTGCTATTAACCTTGCAAAGTTC                                |
| hetN-BamHI-R            | ATATAGGATCCTCATGAGCGATGAGACTCAAC                                  |
| HetN-EcoRI-F-petE       | ATATAGAATTCATGACA ACTCTTACAGGTAAG                                 |
| HetN-GTG-to-GTT-QC-F    | GCGATCGCTATTCCTTTTGATGTTAGGAACACATCACAATTATCG                     |
| HetN-GTG-to-GTT-QC-R    | CGATAATTGTGATGTGTTCCCTAACATCAA AAGGAATAGCGATCGC                   |
| hetN-Tln-BglII-R        | AGATCTTGAGCGATGAGACTCAACAGCTACATAGC                               |
| HetN(MIL)-EcoRI-F       | ATATAGAATTCCTCACA ACTCTTACAGGTAAG                                 |
| HetN-Mod-M2-QC-F        | CACTAATCTATTGGCTGCTCTCGAATTAACACGTTTGTAC                          |
| HetN-Mod-M2-QC-R        | GTAACAAACGTGTTAATTCGAGAGCAGCCAATAGATTAGTG                         |
| MMERGSGR-Sub Met-F2     | CTACCCAGCCTCCTCGAACGCGGTA                                         |
| MMERGSGR-Sub Met-R2     | ACCGCGTTCGAGGAGGCTGGGTAGT                                         |
| patSfor                 | GATATCTAATCGATGCCACATCTAAG                                        |
| patSrev                 | CACATTAATCTCACTAACTTCTACATC                                       |
| PhetN-Bam-F             | ATATAGGATCCAGGAGAAGACGCGATGAATC                                   |
| PhetN-MunI-F            | ATATACAATTGAGGAGAAGACGCGATGAATC                                   |
| PpetE-MunI-R            | TATATCAATTGGCTGAGGTA CTGAGTACACAGC                                |
| up-hetN-F               | GAGCTCGGCAAGCAGAGTTAATC                                           |

\* Oligonucleotides are shown in the 5' to 3' direction.

**Table S2.** Phenotypic and statistical analysis of *Anabaena* strains harboring plasmids expressing various *hetN* alleles fused to YFP.

| Plasmid Construct:                   | % Heterocysts 24H N <sub>2</sub> | t-test comparison to the Empty Vector | YFP detected in Wt from P <i>petE</i> | YFP detected in <i>hetR(R250K)</i> from P <i>petE</i> | YFP detected in <i>hetR(R250K)</i> from P <i>hetN</i> |
|--------------------------------------|----------------------------------|---------------------------------------|---------------------------------------|-------------------------------------------------------|-------------------------------------------------------|
| Empty Vector                         | 7.6 ± 0.4                        | (--)                                  | No                                    | No                                                    | No                                                    |
| <i>hetN</i>                          | 0                                | 0.0001                                | Yes                                   | Yes                                                   | Yes                                                   |
| <i>hetN(M1L)</i>                     | 0                                | 0.0001                                | No                                    | No                                                    | No                                                    |
| <i>hetN(M119L)</i>                   | 0                                | 0.0001                                | Yes                                   | Yes                                                   | Yes                                                   |
| <i>hetN(M129L/M130L)</i>             | 0                                | 0.0001                                | Yes                                   | Yes                                                   | Yes                                                   |
| <i>hetN(M1L, M119L)</i>              | 6.13 ± 0.11                      | 0.003                                 | No                                    | No                                                    | No                                                    |
| <i>hetN(M1L, M129L/M130L)</i>        | 0.06 ± 0.11                      | 0.0001                                | No                                    | No                                                    | No                                                    |
| <i>hetN(M119L, M129L/M130L)</i>      | 0                                | 0.0001                                | Yes                                   | Yes                                                   | Yes                                                   |
| <i>hetN(M1L, M119L, M129L/M130L)</i> | 6.86 ± 0.9                       | 0.26                                  | No                                    | No                                                    | No                                                    |

**Table S3.** Statistical analysis of the heterocyst percentages produced from *Anabaena* strains expressing various *hetN* alleles from the native locus compared to the wild type and  $\Delta$ *hetN* strain.

|                                                 | Wild type                    | $\Delta$ <i>hetN</i>         |
|-------------------------------------------------|------------------------------|------------------------------|
| ANOVA P-value                                   | $1.92 * 10^{-15}$            | $1.41 * 10^{-15}$            |
| Strain:                                         | Pairwise t-test<br>(P-value) | Pairwise t-test<br>(P-value) |
| <i>hetN(MIL)</i>                                | 0.14                         | <0.0001                      |
| <i>hetN(M119L)</i>                              | <0.0001                      | 0.0007                       |
| <i>hetN(M129L/M130L)</i>                        | 0.24                         | <0.0001                      |
| <i>hetN(MIL, M119L)</i>                         | 0.0008                       | 0.18                         |
| <i>hetN(MIL, M129L/M130L)</i>                   | 0.07                         | <0.0001                      |
| <i>hetN(M119L, M129L/M130L)</i>                 | 0.0004                       | 0.47                         |
| <i>hetN(MIL, M119L, M129L/M130L)</i>            | <0.0001                      | 0.23                         |
| <i>hetN(MIL, V64V(GTG to GTT), M129L/M130L)</i> | 0.05                         | <0.0001                      |
| <i>hetN(E131A)</i>                              | 0.0004                       | 0.01                         |
| <i>hetN(E131L)</i>                              | 0.0001                       | 0.03                         |
| <i>hetN(E131Q)</i>                              | 0.01                         | <0.0001                      |

## MATERIALS AND METHODS

Plasmids pAD120, pAD121, pAD122, pAD123, pAD124, pAD125, pAD126, and pAD127 are mobilizable shuttle vectors based on pAM504 (1) containing  $P_{hetN}$ -*hetN*(MIL)-YFP,  $P_{hetN}$ -*hetN*(M119L)-YFP,  $P_{hetN}$ -*hetN*(M129L/M130L)-YFP,  $P_{hetN}$ -*hetN*(MIL, M119L)-YFP,  $P_{hetN}$ -*hetN*(MIL, M129L/M130L)-YFP,  $P_{hetN}$ -*hetN*(MIL, M119L, M129L/M130L)-YFP, and  $P_{hetN}$ -*hetN*-YFP, respectively.  $P_{hetN}$ -*hetN*(MIL),  $P_{hetN}$ -*hetN*(M119L),  $P_{hetN}$ -*hetN*(M129L/M130L),  $P_{hetN}$ -*hetN*(MIL, M119L),  $P_{hetN}$ -*hetN*(MIL, M129L/M130L),  $P_{hetN}$ -*hetN*(MIL, M119L, M129L/M130L), or  $P_{hetN}$ -*hetN* were amplified by PCR with the primers PhetN-MunI-F and hetN-Tln-BglIII-R from the plasmids pOR101, pOR102, pOR103, pOR104, pOR105, pOR106, pOR107, and pDR382 (2), respectively, digested with *MunI*-*BglIII*, and individually cloned into the *EcoRI*-*BamHI* sites of pPJAV153 (3) to create pAD120, pAD121, pAD122, pAD123, pAD124, pAD125, pAD126, and pAD127.

Plasmids pAD128, pAD129, pAD130, pAD131, pAD132, pAD133, pAD134, and pAD135 are mobilizable shuttle vectors based on pAM504 containing  $P_{petE}$ -*hetN*(MIL)-YFP,  $P_{petE}$ -*hetN*(M119L)-YFP,  $P_{petE}$ -*hetN*(M129L/M130L)-YFP,  $P_{petE}$ -*hetN*(MIL, M119L)-YFP,  $P_{petE}$ -*hetN*(MIL, M129L/M130L)-YFP,  $P_{petE}$ -*hetN*(MIL, M119L, M129L/M130L)-YFP, and  $P_{petE}$ -*hetN*-YFP, respectively.  $P_{petE}$ -*hetN*(MIL),  $P_{petE}$ -*hetN*(M119L),  $P_{petE}$ -*hetN*(M129L/M130L),  $P_{petE}$ -*hetN*(MIL, M119L),  $P_{petE}$ -*hetN*(MIL, M129L/M130L),  $P_{petE}$ -*hetN*(MIL, M119L, M129L/M130L), and  $P_{petE}$ -*hetN* were amplified by PCR with the primers PpetE-MunI-F and hetN-Tln-BglIII-R from the plasmids pOR108, pOR109, pOR110, pOR111, pOR112, pOR113, pOR114 and pDR320 (4), respectively, digested with *MunI*-*BglIII*, and individually cloned into the *EcoRI*-*BamHI* sites of pPJAV153 to create pAD128, pAD129, pAD130, pAD131, pAD132, pAD133, pAD134, and pAD135.



Plasmid pAHB174 is a suicide vector based on pRL277 (5) to introduce *hetN(MIL, M129L/M130L)* with a point mutation to change the codon for V64 from a GTG to a GTT valine at the native locus. The plasmid pOR105 was amplified by PCR with the primers HetN-GTG-to-GTT-QC-F and HetN-GTG-to-GTT-QC-R and QuickChange was done to create pAHB174.

Plasmid pOR101 is a suicide vector based on pRL277 to introduce *hetN(MIL)* at the native locus. Regions up- and downstream of the HetN start codon were amplified from pDR382 with the primer pairs PhetN-Bam-F and hetN Mod-M1 R and hetN Mod-M1 F and HetN-SacI-R, respectively. The products harboring the mutation were fused by overlap extension PCR (6), digested with *SpeI-SacI*, and cloned into the same sites of pDR382 replacing the native allele to create pOR101.

Plasmid pOR102 is a suicide vector based on pRL277 to introduce *hetN(M119L)* at the native locus. The plasmid pDR382 was amplified by PCR with the primers HetN-Mod-M2-QC-F and HetN-Mod-M2-QC-R and QuickChange was done to create pOR102.

Plasmid pOR103 is a suicide vector based on pRL277 to introduce *hetN(M129L/M130L)* at the native locus. Regions up- and downstream of *hetN(M129/M130)* were amplified from pDR382 with the primer pairs PhetN-Bam-F and MMERGSGR-Sub Met-R2 and MMERGSGR-Sub Met-F2 and HetN-SacI-R, respectively. The products harboring the mutation were fused by overlap extension PCR, digested with *SpeI-SacI*, and cloned into the same sites of pDR382 replacing the native allele to create pOR103.

Plasmid pOR104 is a suicide vector based on pRL277 to introduce *hetN(MIL, M119L)* at the native locus. The plasmid pOR101 was amplified by PCR with the primers HetN-Mod-M2-QC-F and HetN-Mod-M2-QC-R and QuickChange was done to create pOR104.

Plasmids pOR105, pOR106, and pOR107 are suicide vectors based on pRL277 to introduce *hetN(M1L, M129L/M130L)*, *hetN(M119L, M129L/M130L)*, and *hetN(M1L, M119L, M129L/M130L)*, respectively, at the native locus. Regions up- and downstream were amplified from pOR101, pOR102, and pOR104, respectively, with the primer pairs PhetN-Bam-F and MMERGSGR-Sub Met-R2 and MMERGSGR-Sub Met-F2 and HetN-SacI-R, respectively. The products harboring the mutation were fused by overlap extension PCR, digested with *SpeI-SacI*, and cloned into the same sites of pDR382 replacing the native allele to create pOR105, pOR106, and pOR107.

Plasmids pOR108, pOR111, pOR112, and pOR114 are mobilizable shuttle vectors based on pAM504 containing  $P_{petE}$ -*hetN(M1L)*,  $P_{petE}$ -*hetN(M1L, M119L)*,  $P_{petE}$ -*hetN(M1L, M129L/M130L)*, and  $P_{petE}$ -*hetN(M1L, M119L, M129L/M130L)*, respectively. The *hetN(M1L)*, *hetN(M1L, M119L)*, *hetN(M1L, M129L/M130L)*, and *hetN(M1L, M119L, M129L/M130L)* alleles were amplified by PCR from pOR101, pOR104, pOR105, and pOR107, respectively, with the primers HetN(M1L)-EcoRI-F and hetN-BamHI-R. The products were digested with *EcoRI-BamHI* and cloned into the same sites in pJAV213 to create pOR108, pOR111, pOR112, and pOR114.

Plasmids pOR109, pOR110, and pOR113 are mobilizable shuttle vectors based on pAM504 containing  $P_{petE}$ -*hetN(M119L)*,  $P_{petE}$ -*hetN(M129L/M130L)*, and  $P_{petE}$ -*hetN(M119L, M129L/M130L)*, respectively. The *hetN(M119L)*, *hetN(M129L/M130L)*, and *hetN(M119L, M129L/M130L)* alleles were amplified by PCR from pOR102, pOR103, and pOR106, respectively, with the primers HetN-EcoRI-F-petE and hetN-BamHI-R. The products were digested with *EcoRI-BamHI* and cloned into the same sites in pJAV213 to create pOR109, pOR110, and pOR113.

Plasmids pOR115 and pOR116 are suicide vectors based on pRL277 to introduce *hetN(E131A)* and *HetN(E131L)*, respectively, at the native locus. Regions up- and downstream of *hetN(E131)* were amplified by PCR from pDR382 with the primers PhetN-Bam-F and HetN E->A Rev and HetN E->A Fwd and *hetN SacI-R* for E131A or PhetN-Bam-F and HetN E->L Rev and HetN E->L Fwd and *hetN SacI-R* for E131L. The products harboring the mutation were fused by overlap extension PCR, digested with *SpeI-SacI*, and individually cloned into the same sites of pDR382 replacing the native allele to create pOR115 and pOR116.

Plasmid pPJAV348 is a suicide vector based on pRL277 to replace the coding region of *hetN* with *patS* at the native *hetN* locus. Regions directly up- and downstream of the *hetN* coding region were amplified by PCR from *Anabaena* chromosomal DNA with the primer pairs *hetMF-BamHI* and *dhetNup-S-OEX-R* and *dhetNup-S-OEX-F* and *hetIR-SacI*, respectively. The products were fused together by overlap extension PCR, such that the region of overlap on the primers introduced the *patS* coding region, and cloned into the *NruI* site of pRL277 to create pPJAV348.

Plasmid pPJAV349 is a suicide vector based on pRL277 to replace the coding region of *patS* with *hetN* at the native *patS* locus. Regions directly up- and downstream of the *patS* coding region were amplified from *Anabaena* chromosomal DNA with the primer pairs 5'*patSSacF* and *dpatSup-N-OEX-R* and *dpatSdn-N-OEX-F* and 3'*patSBglIIR*, respectively, and the coding region of *hetN* was amplified with the primers *dpatS-N-OEX-F* and *dpatS-N-OEX-R*. The *hetN* coding region and regions up- and downstream of *patS* were fused together by overlap extension PCR and the product was cloned into the *NruI* site in pRL277 to create pPJAV349.

Plasmid pPJAV369 is a suicide vector based on pRL277 to introduce *hetN(E131Q)* at the native locus. Regions up- and downstream of *hetN(E131)* were amplified by PCR from pDR382

with the primers PhetN-Bam-F and HetN E->Q Rev and HetN E->Q Fwd and hetN SacI-R, respectively. The products harboring the mutation were fused by overlap extension PCR, digested with *SpeI-SacI*, and cloned into the same sites of pDR382 replacing the native allele to create pPJAV369.

## REFERENCES

1. Wei T-F, Ramasubramanian R, Golden JW. 1994. *Anabaena* sp. strain PCC 7120 *ntcA* gene required for growth on nitrate and heterocyst development. *J Bacteriol* 176:4473-4482.
2. Higa KC, Rajagopalan R, Risser DD, Rivers OS, Tom SK, Videau P, Callahan SM. 2012. The RGSGR amino acid motif of the intercellular signaling protein, HetN, is required for patterning of heterocysts in *Anabaena* sp. strain PCC 7120. *Mol Microbiol* 83:682-693.
3. Rivers OS, Videau P, Callahan SM. 2014. Mutation of *sepJ* reduces the intercellular signal range of a *hetN*-dependent paracrine signal, but not of a *patS*-dependent signal, in the filamentous cyanobacterium *Anabaena* sp. strain PCC 7120. *Mol Microbiol* 94:1260-1271.
4. Risser DD, Callahan SM. 2009. Genetic and cytological evidence that heterocyst patterning is regulated by inhibitor gradients that promote activator decay. *Proc Natl Acad Sci USA* 106:19884-19888.
5. Cai Y, Wolk CP. 1990. Use of a conditionally lethal gene in *Anabaena* sp. strain PCC 7120 to select for double recombinants and to entrap insertion sequences. *J Bacteriol* 172:3138-3145.
6. Higuchi R, Krummel B, Saiki RK. 1988. A general method of *in vitro* preparation and specific mutagenesis of DNA fragments: study of protein and DNA interactions. *Nucleic Acids Res* 16:7351-7367.
